# Supplementary material
Source: publisher figshare collection journal article supplement (https://gsajournals.figshare.com/articles/dataset/_/7730369)
Supplement: Supplementary file 3 [file 1]

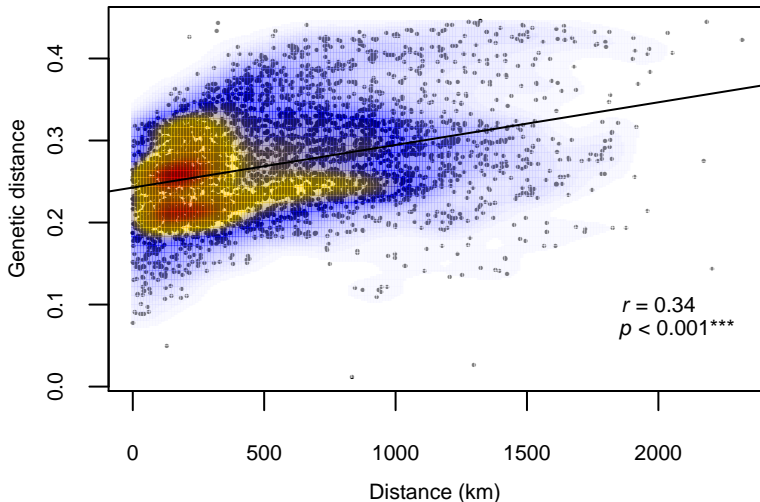

Figure S5. Pairwise isolation by distance of 98 accessions. Colors present the density from low (blue) to high (red).
