# Supplementary material
Source: publisher figshare collection journal article supplement (https://gsajournals.figshare.com/articles/dataset/_/7730369)
Supplement: Supplementary file 4 [file 1]

**A** PCA of SolCAP meta-data with bi-allelic polymorphic SNPs (2,934 SNPs)

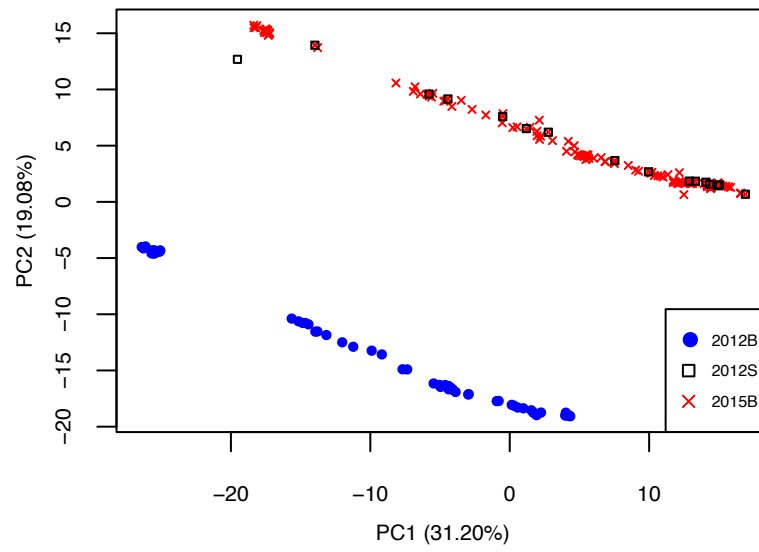

**B** PCA of SolCAP meta-data with consistent SNP calling (2,307 SNPs)

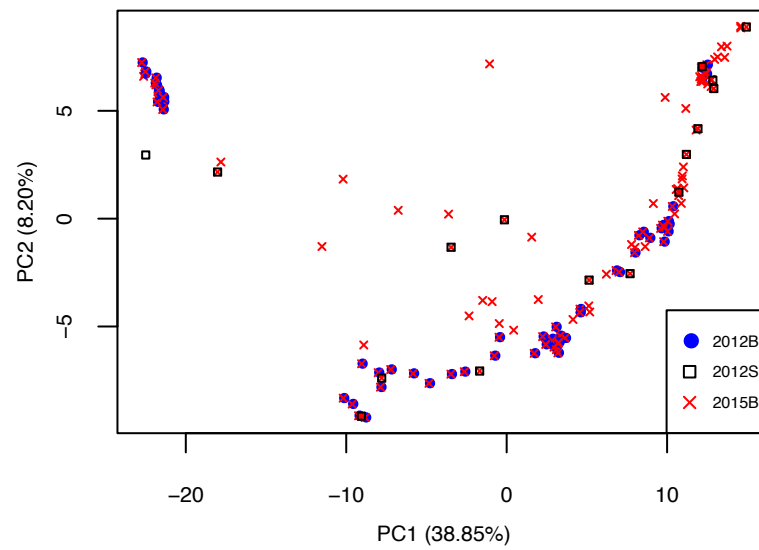

Figure S9. The PCA of SolCAP meta-analysis. A)The PCA plot of bi-allelic SNPs. B) The PCA plot after removing those SNPs of reverse-complement allele designation.
