# Supplementary material
Source: publisher figshare collection journal article supplement (https://gsajournals.figshare.com/articles/dataset/_/7730369)
Supplement: Supplementary file 5 [file 1]

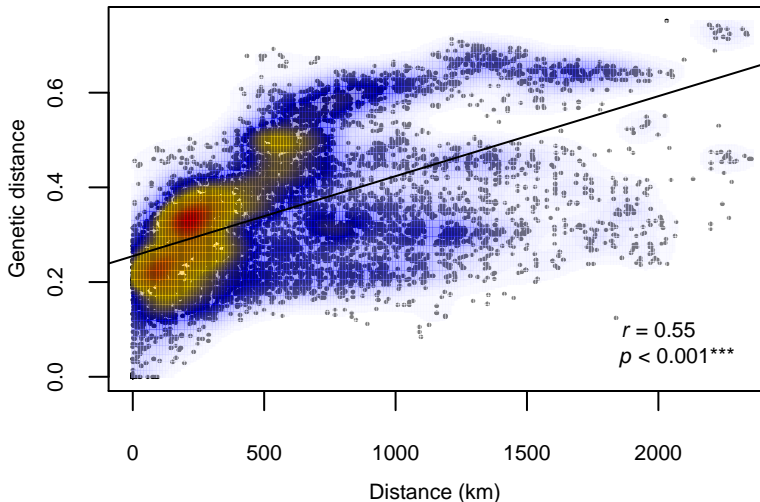

Figure S6. Pairwise isolation by distance of SolCAP meta-analysis. Colors present the density from low (blue) to high (red).
