# Supplementary material
Source: publisher figshare collection journal article supplement (https://gsajournals.figshare.com/articles/dataset/_/7730369)
Supplement: Supplementary file 7 [file 1]

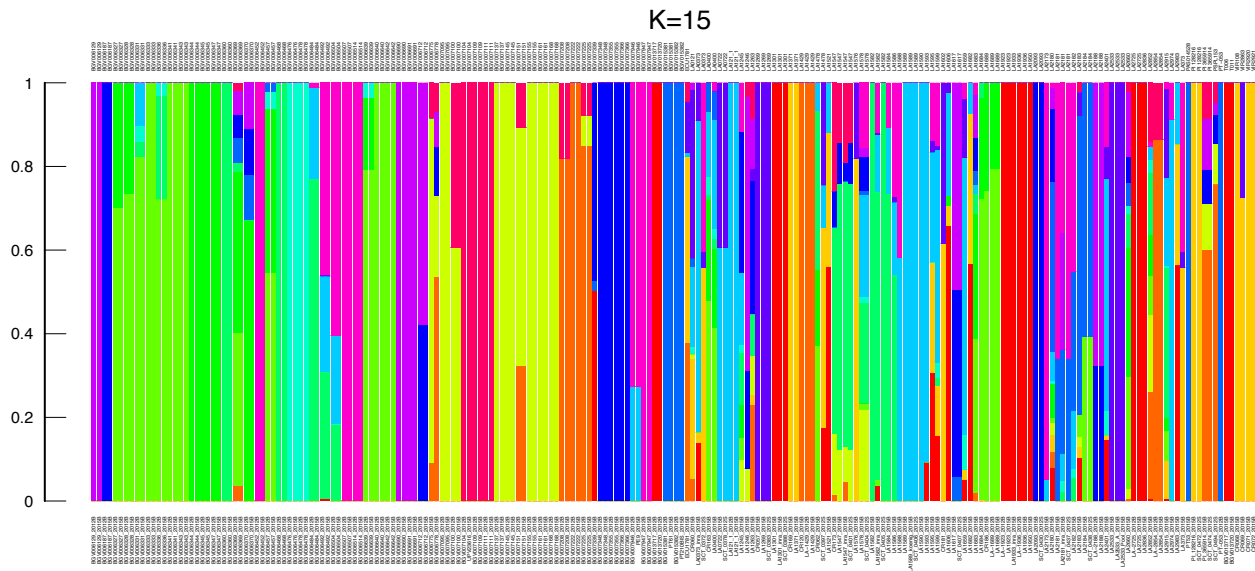

Figure S8. The genome patterns of 214 samples in SolCAP meta-analysis. The labels on the top indicate the accessions; the labels on the bottom indicate the sample ID in this meta-analysis.
