# Supplementary material
Source: publisher figshare collection journal article supplement (https://gsajournals.figshare.com/articles/dataset/_/7730369)
Supplement: Supplementary file 8 [file 1]

### Overall LD decay

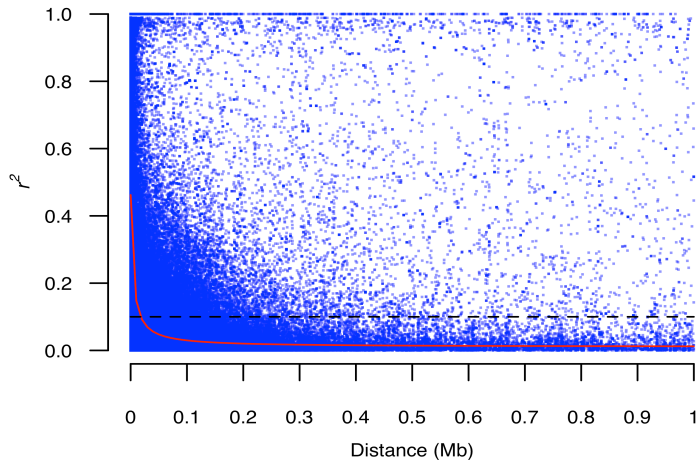

Figure S2. LD decay of the whole genome. The red curve indicates non-linear regression. The dotted line indicates the fixed  $r^2$  on 0.1.
