# Supplementary material
Source: publisher figshare collection journal article supplement (https://gsajournals.figshare.com/articles/dataset/_/7730369)
Supplement: Supplementary file 9 [file 1]

**File S1.** The analysis of isolation by distance.

## **MATERIALS AND METHODS**

Pairwise genetic distance was measured by Rogers' distance (Rogers 1972). Geographic distance was calculated by the R package geosphere (Hijmans 2016). The significance of the correlation between pairwise genetic distance and geographic distance was examined by the Mantel test in the R package adegenet with 1,000 permutations (Jombart 2008).

## **RESULTS**

For the analysis of isolation by distance using all pairs of samples, the correlation coefficient between the genetic distance and geographic distance was 0.34, and this correlation was statistically significant ( $p\text{-value} < 0.001$ ) (Figure S5).

## **LITERATURE CITED**

- Hijmans, R. J., 2016 geosphere: Spherical Trigonometry. R package version 1.5-5.
- Jombart, T., 2008 Adegnet: A R package for the multivariate analysis of genetic markers. *Bioinformatics* 24: 1403–1405.
- Rogers, J. S., 1972 Measures of similarity and genetic distance, pp. 145–153 in *In Studies in Genetics VII*, University of Texas Publication 7213., Austin, Texas.
