# Supplementary material
Source: publisher figshare collection journal article supplement (https://gsajournals.figshare.com/articles/dataset/_/7730369)
Supplement: Supplementary file 10 [file 1]

**Chr. 1**

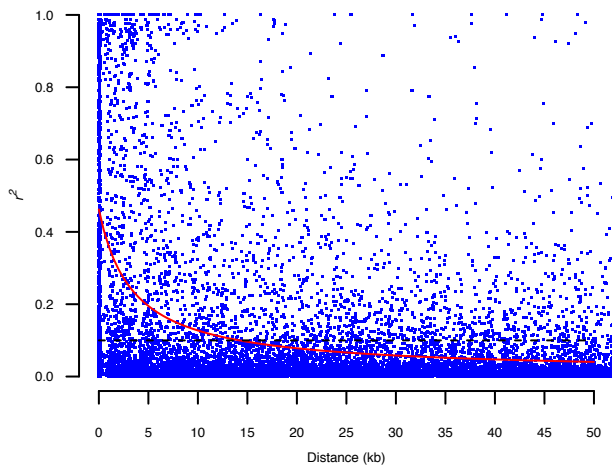

**Chr. 2**

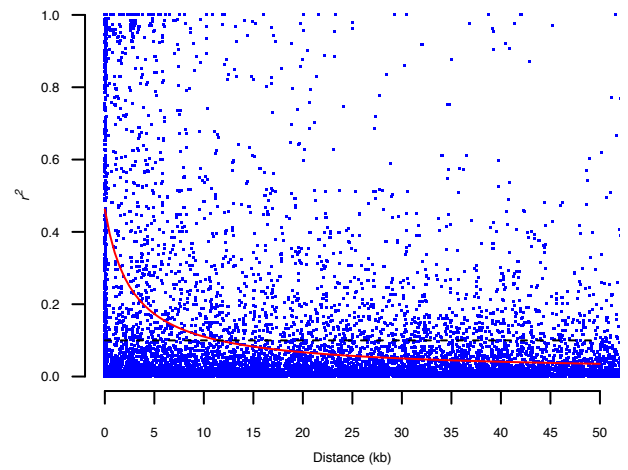

**Chr. 3**

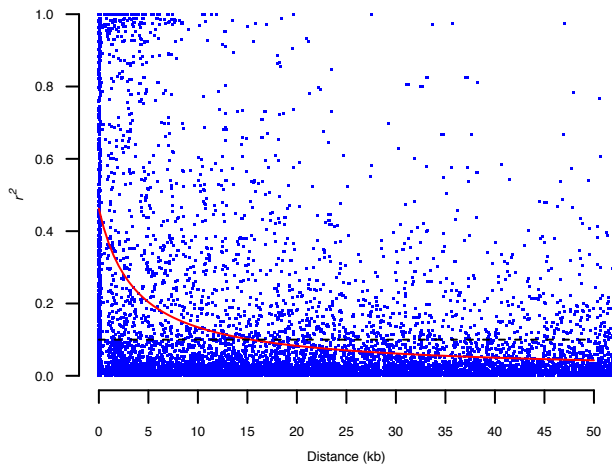

**Chr. 4**

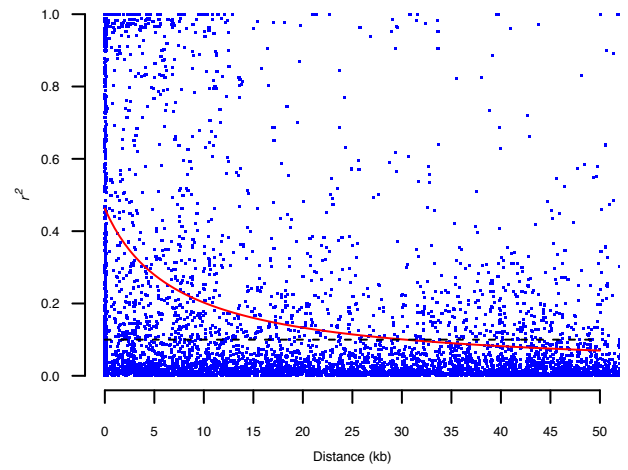

**Chr. 5**

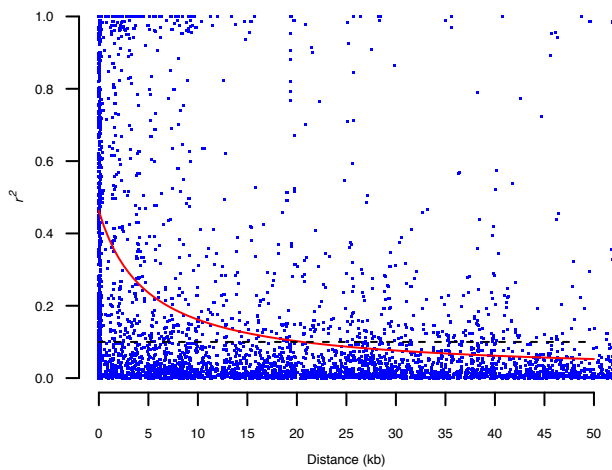

**Chr. 6**

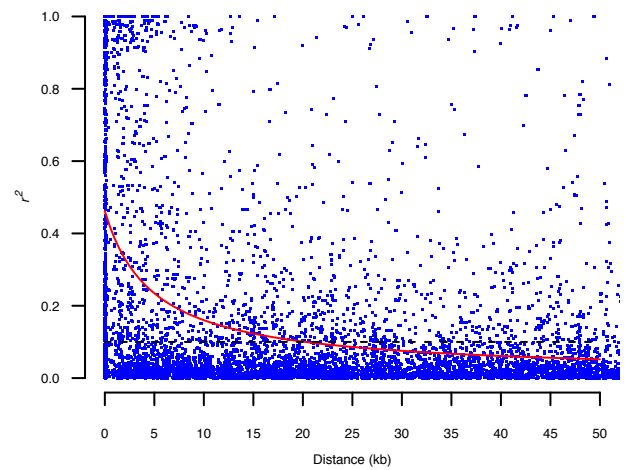

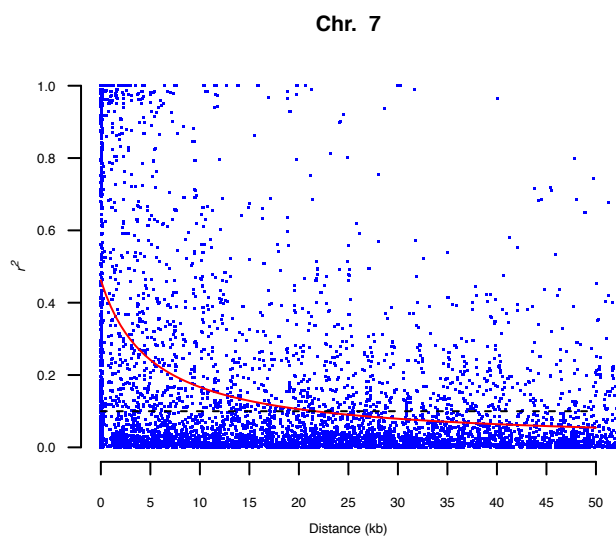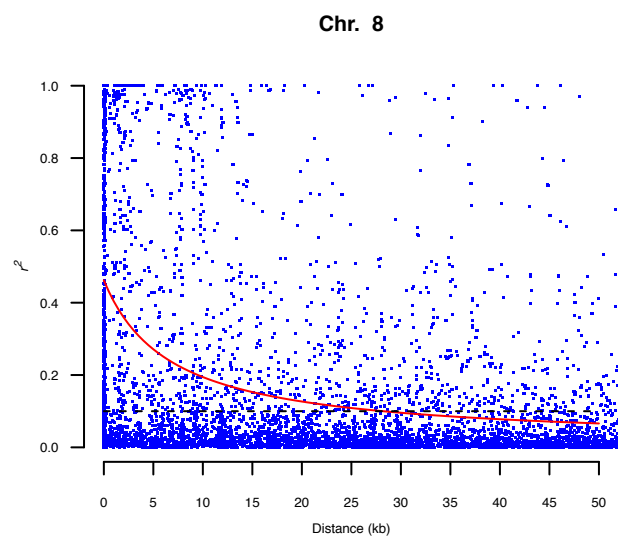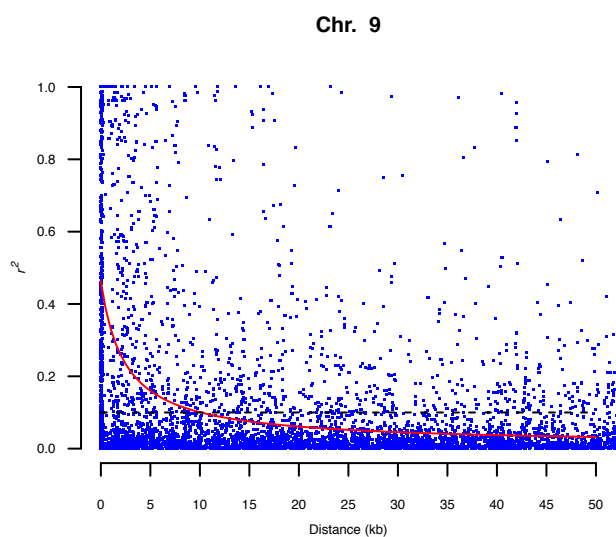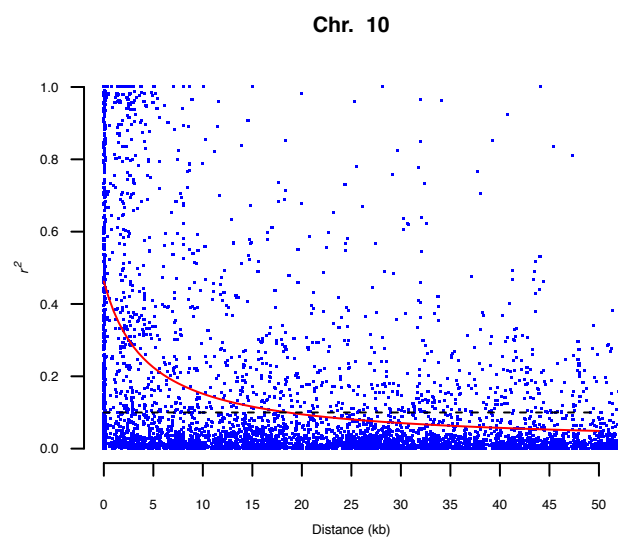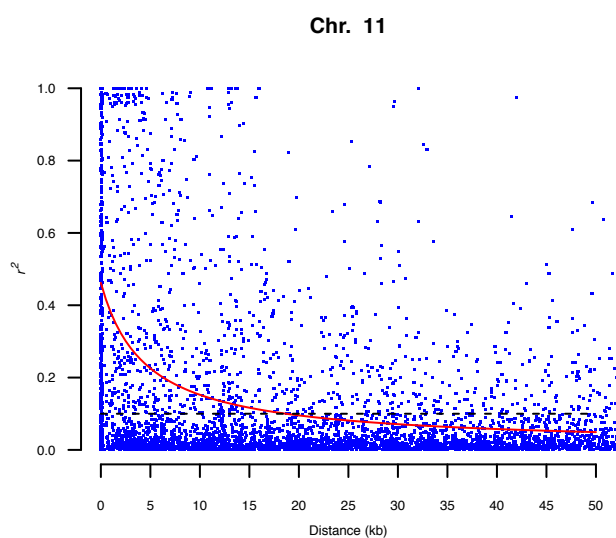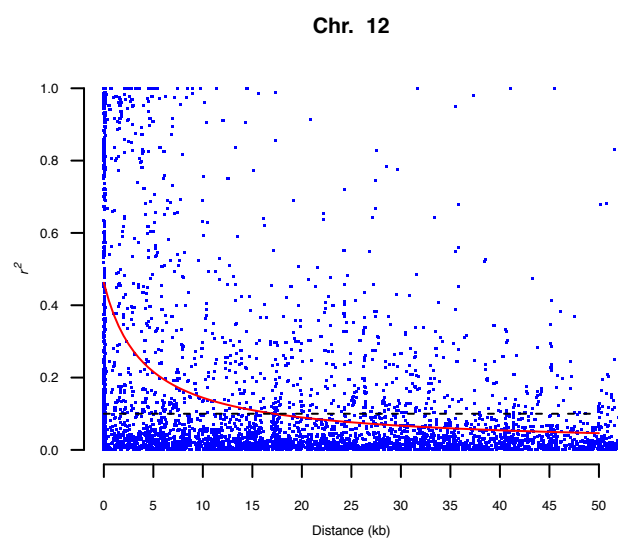

Figure S3. 50 kb interval LD decay of each chromosome. The red curves indicate non-linear regression. Black dotted lines indicate the fixed  $r^2$  on 0.1.
