# Supplementary material
Source: publisher figshare collection journal article supplement (https://gsajournals.figshare.com/articles/dataset/_/7730369)

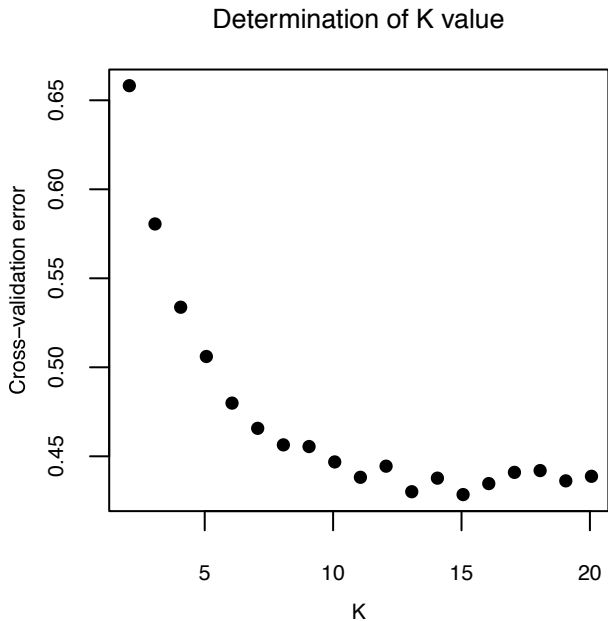

Figure S7. The cross-validation error of SolCAP meta-analysis.

Supplement: Supplementary file 1 [file 1]

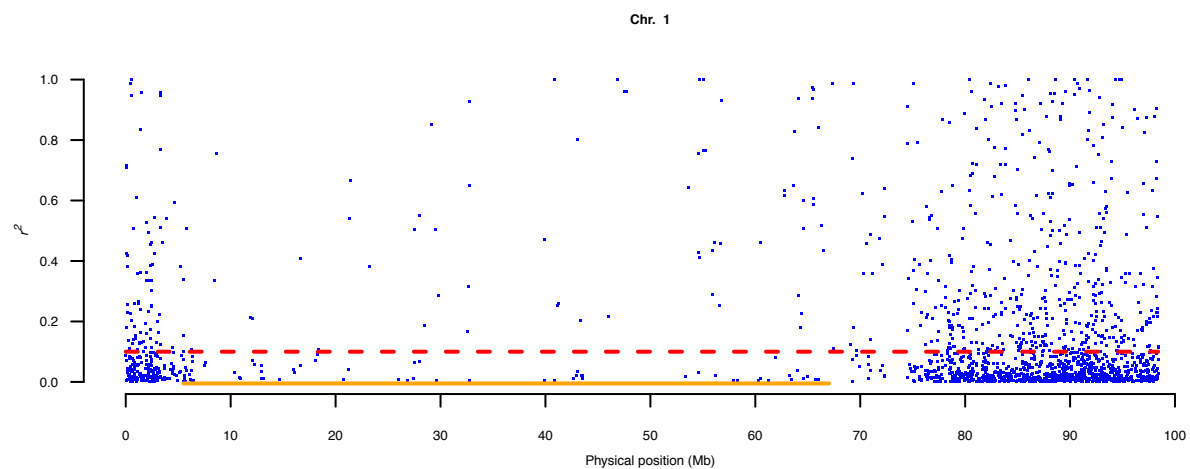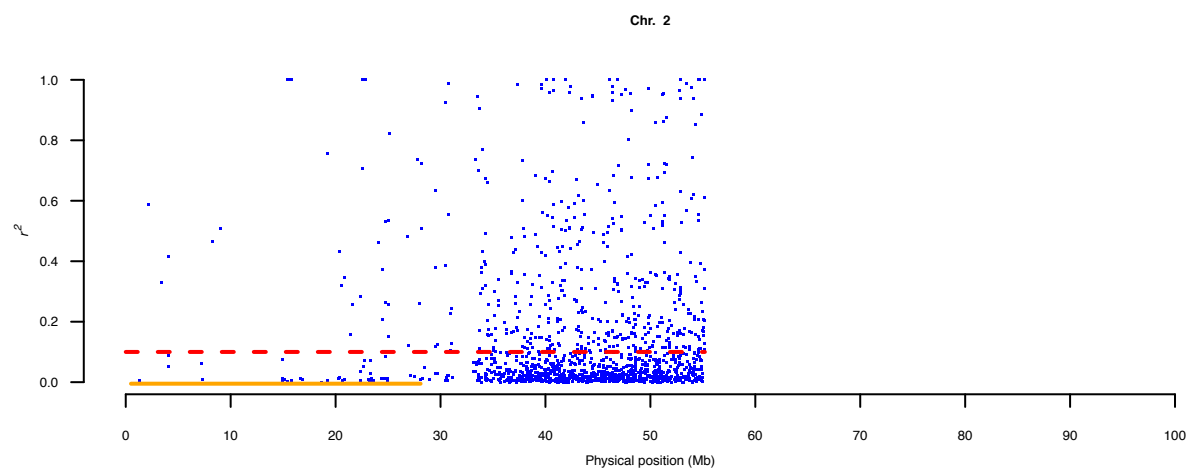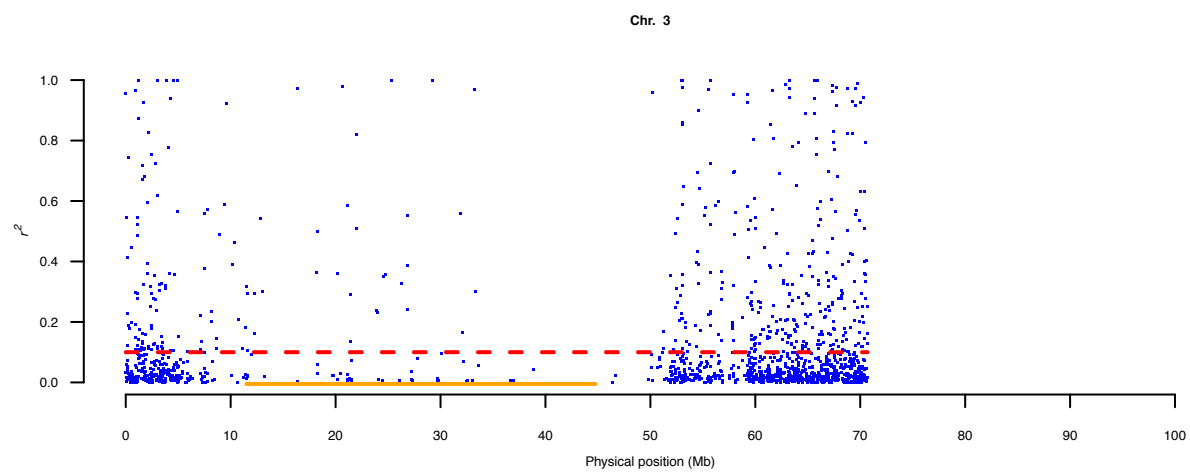

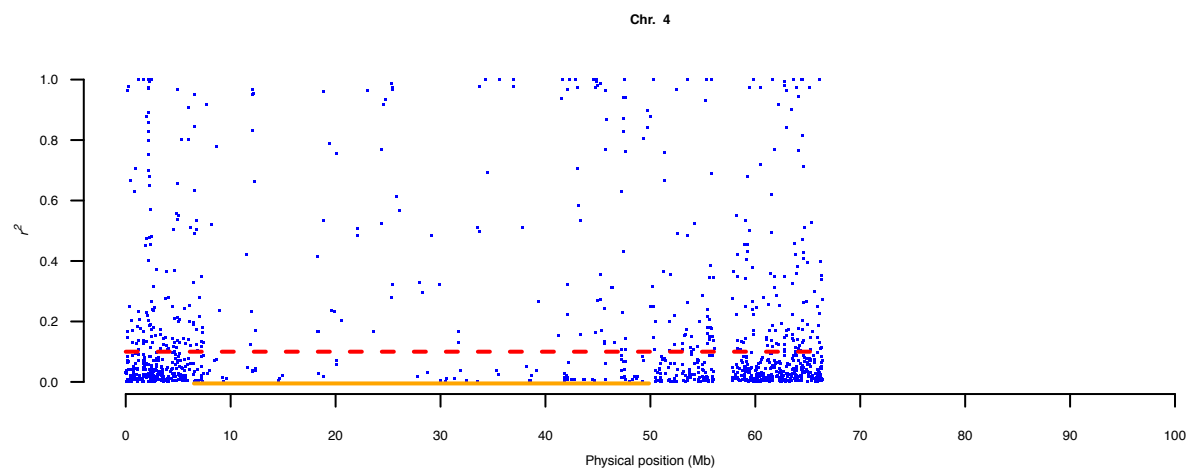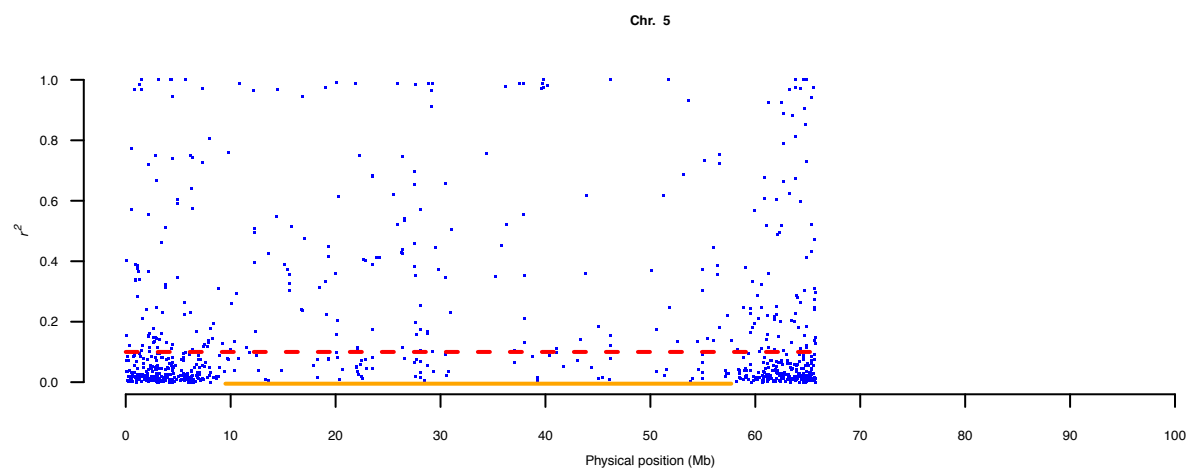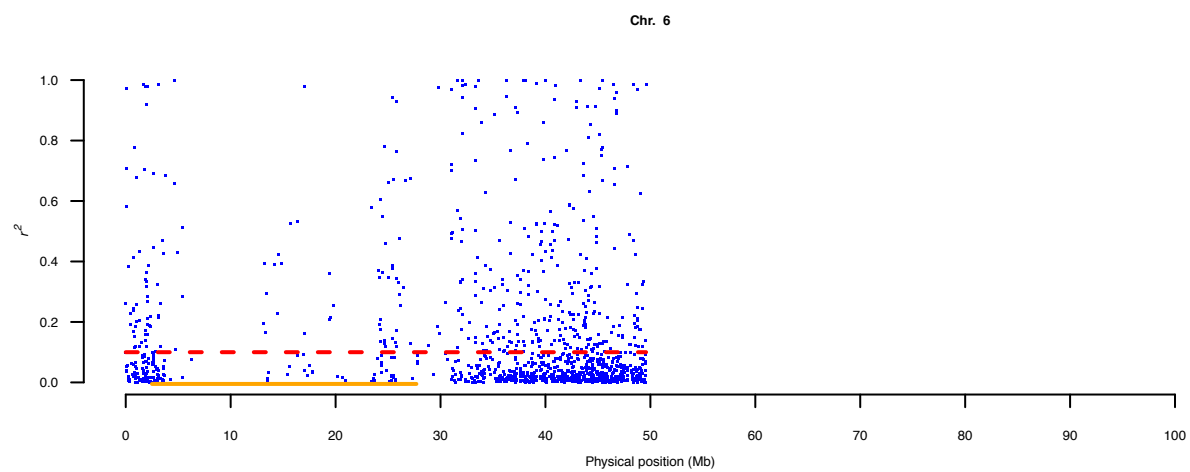

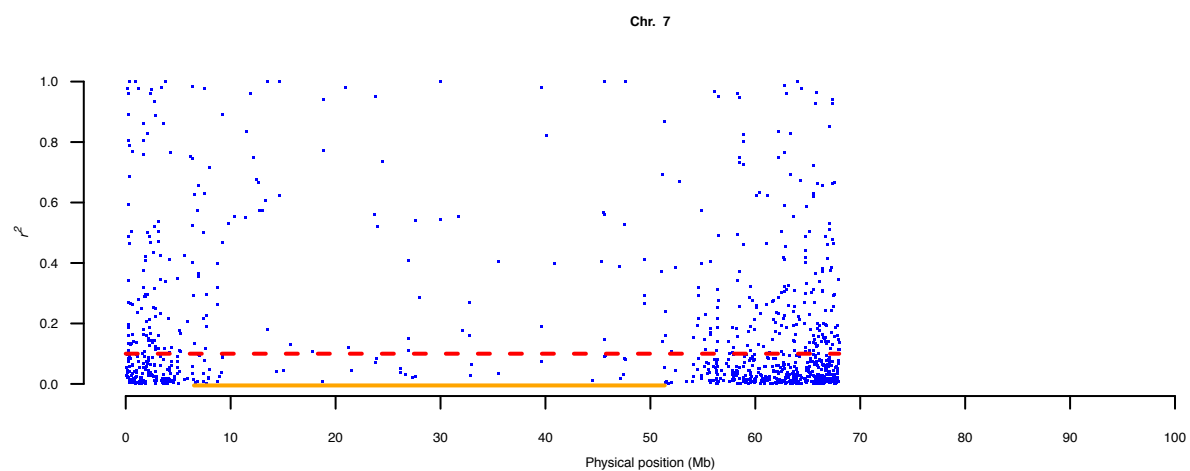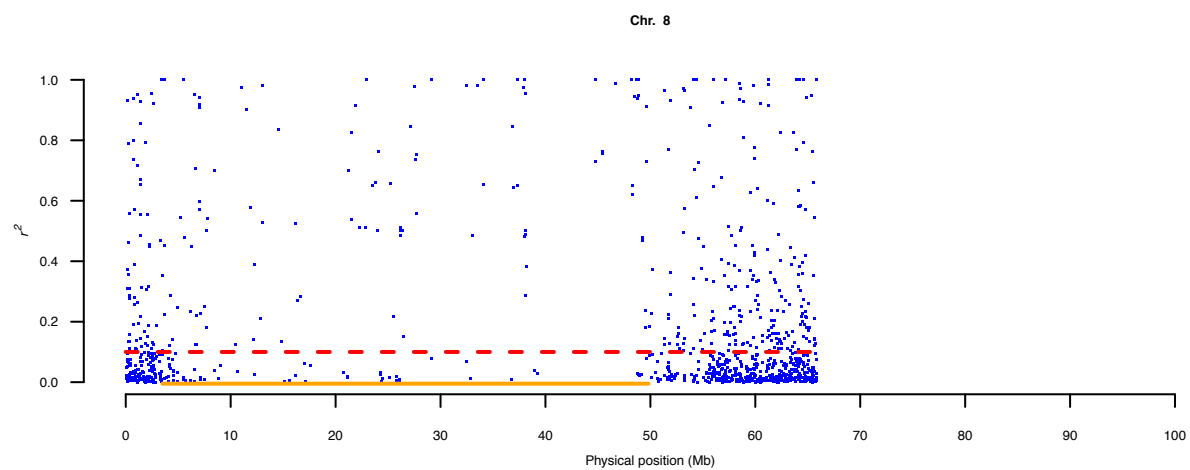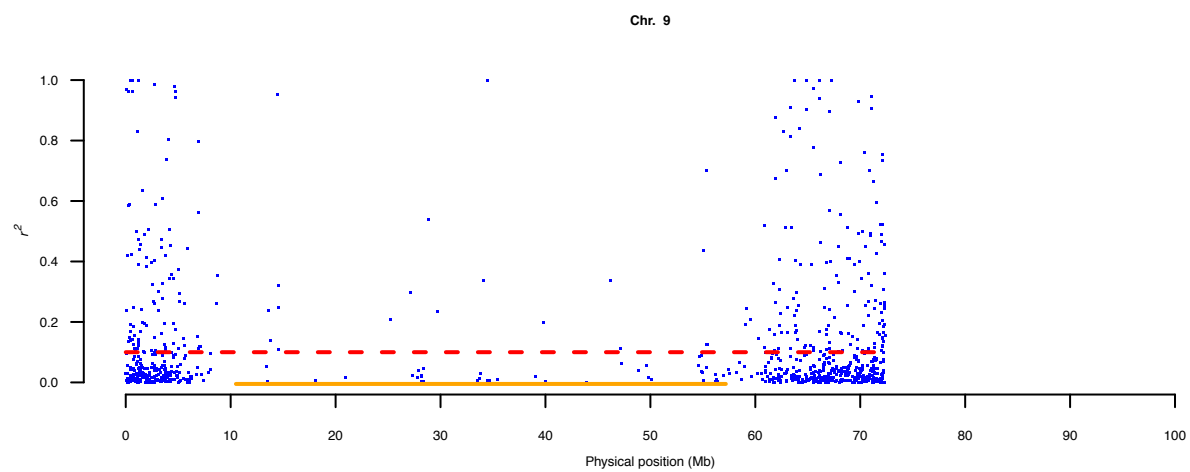

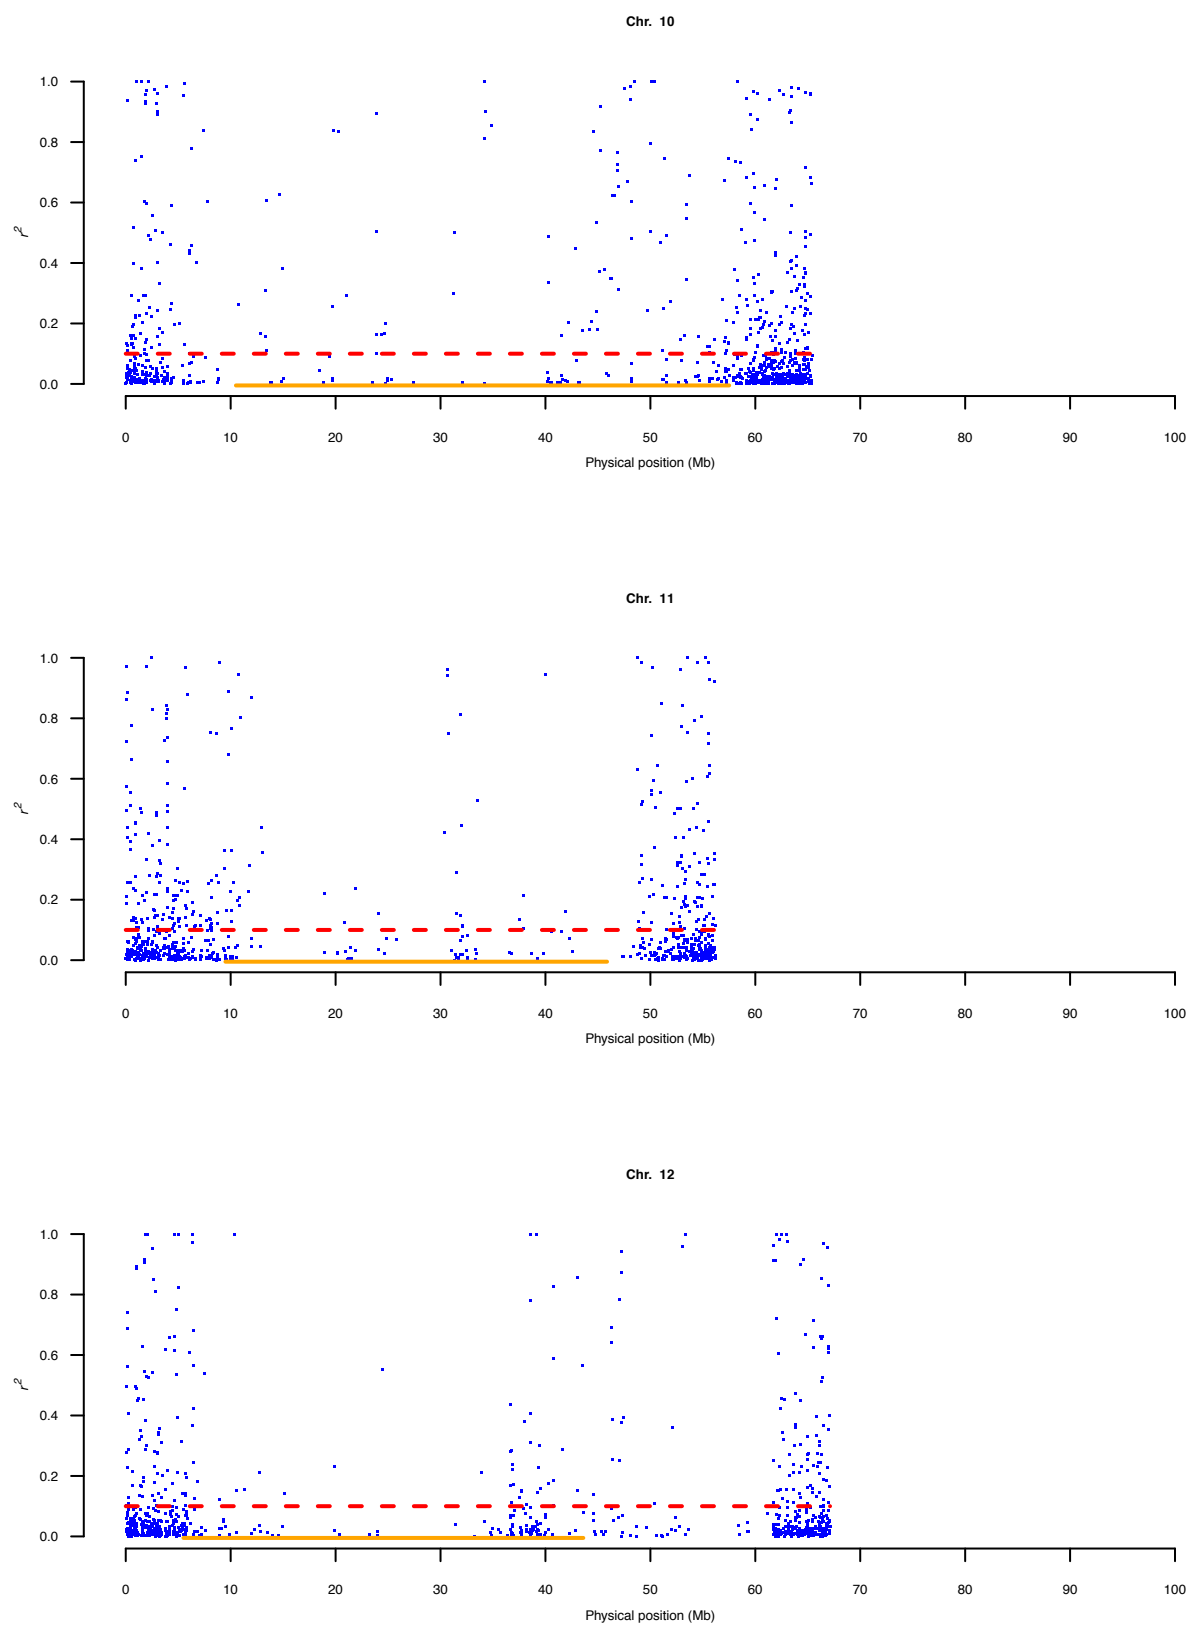

Figure S4. The local LD of each chromosome.

Supplement: Supplementary file 2 [file 1]

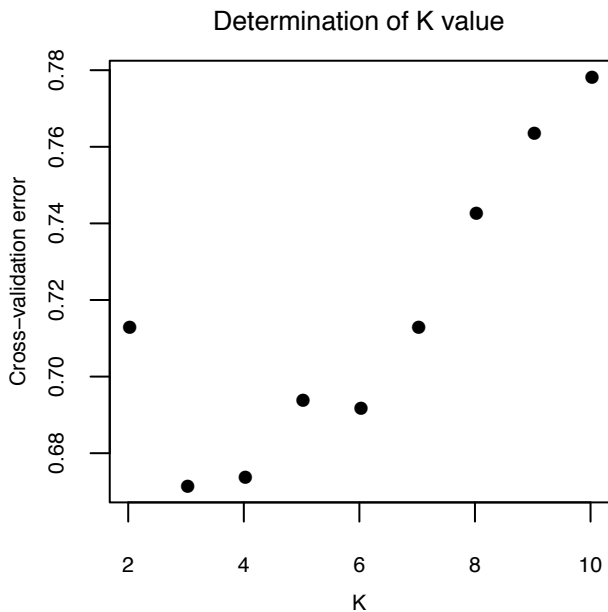

Figure S1. The cross-validation error of K value in ADMIXTURE.

Supplement: Supplementary file 11 [file 1]
